# Supplementary material
Source: PubMed Central journal article supplement (PMC1393285)
Supplement: NIHMS4161-supplement-SuppInfo.pdf [file NIHMS4161-supplement-SuppInfo.pdf]

**(Imido)Titanium Complexes as Hydroamination Catalysts: Substantially Enhanced  
Reactivity from an Unexpected Cyclopentadienide/Amide Ligand Exchange**

Jeffrey S. Johnson and Robert G. Bergman\*

*Department of Chemistry, University of California, Berkeley, CA 94720*

**Supporting Information**

|                                                                                                                   |            |
|-------------------------------------------------------------------------------------------------------------------|------------|
| <b>I. Synthetic Procedures for preparation of imines from allene and amines</b>                                   | <b>S2</b>  |
| <b>II. Synthetic Procedures, and IR and combustion analysis data for 6•py, 6•OPMe<sub>3</sub>,<br/>15, 16, 17</b> | <b>S2</b>  |
| <b>III. <sup>1</sup>H NMR Spectroscopic Data for New Compounds (Table S1)</b>                                     | <b>S4</b>  |
| <b>IV. <sup>13</sup>C{<sup>1</sup>H} NMR Spectroscopic Data for New Compounds (Table S2)</b>                      | <b>S6</b>  |
| <b>V. Kinetic Studies of Allene Hydroamination Catalyzed by 6•py</b>                                              | <b>S9</b>  |
| <b>VI. Data from the X-ray Diffraction Study of 6•OPMe<sub>3</sub></b>                                            | <b>S14</b> |

## I. Synthetic Procedures for preparation of imines from allene and amines

**Hydroamination of allene catalyzed by  $\text{Cp}_2\text{TiMe}_2$ . General Procedure.** A vial was charged with 0.2 mmol of amine and *ca.* 0.03 mmol of 1,3,5-trimethoxybenzene. These materials were dissolved in 0.5 mL of a 0.04 M  $\text{C}_6\text{D}_6$  solution of  $\text{CpTiMe}_2$  and the resulting orange solution was transferred to an NMR tube and fitted with a Cajon ultratorr adapter. The solution was degassed with three freeze-pump-thaw cycles and allene (67 torr x 66 mL) was condensed onto the frozen (77 K) solution. The tube was flame-sealed under dynamic vacuum and a single pulse  $^1\text{H}$  NMR spectrum was obtained. The tube was heated to 90 °C until the amine was consumed (as judged by  $^1\text{H}$  NMR spectroscopy). The yield was measured by comparison of the integration of the aryl resonances of 1,3,5-trimethoxybenzene and a well-resolved signal for the product imine.

## II. Synthetic Procedures, and IR and combustion analysis data for **6•py**, **6•OPMe<sub>3</sub>**, **15**, **16**, **17**

**$\text{Cp}(\text{py})(2,6\text{-Me}_2\text{C}_6\text{H}_3\text{NH})\text{Ti}=\text{N}(2,6\text{-Me}_2\text{C}_6\text{H}_3)$  (**6•py**).** An orange solution of 101 mg (0.49 mmol) of dimethyltitanocene, 120 mg (0.99 mmol) of 2,6-dimethylaniline, and 69 mg (0.87 mmol) of pyridine in 5 mL of toluene was heated in a thick-walled glass vessel with Teflon stopcock at 85 °C for 24 h. The resulting brown solution was concentrated *in vacuo* to a brown oil that was vigorously triturated with three 2 mL portions of pentane. The residual oil was subjected to dynamic vacuum to afford 108 mg of a brown foam. The pentane washes were concentrated *in vacuo* to a brown oil that was triturated with three 2 mL portions of pentane. Subjection of the resulting oil to dynamic vacuum afforded another 12 mg of a brown foam. Combined yield = 120 mg.  $^1\text{H}$  NMR analysis revealed the ratio of **6•py**:2,6- $\text{Me}_2\text{C}_6\text{H}_3\text{NH}_2$  = 3.5:1 (12.5:1 w/w). IR (KBr) 3463, 3381, 3036, 2966, 2918, 2852, 1625, 1476, 1439, 1274, 1090, 1017  $\text{cm}^{-1}$ . In our hands it was not possible to completely remove the amine from **6•py** and repeated attempts to obtain satisfactory combustion analysis for **6•py**·2,6- $\text{Me}_2\text{C}_6\text{H}_3\text{NH}_2$  were unsuccessful.

In a separate experiment, a solution of 64 mg (0.31 mmol) of dimethyltitanocene, 74 mg (0.62 mmol) of 2,6-dimethylaniline, and 16.4 mg (0.098 mmol) of 1,3,5-trimethoxybenzene in 4 mL of toluene was heated at 75 °C for 24 h. The resulting brown solution was cooled to 25 °C, treated with 37 mg (0.47 mmol) of pyridine, and heated at 75 °C for 3 h. An aliquot was taken, concentrated *in vacuo*, and analyzed by  $^1\text{H}$  NMR. Integration versus the internal standard revealed the yield of imido complex **6•py** was 62%.

**Conversion of  $\text{Cp}(\text{py})(2,6\text{-Me}_2\text{C}_6\text{H}_3\text{NH})\text{Ti}=\text{N}(2,6\text{-Me}_2\text{C}_6\text{H}_3)$  (**6•py**) into  $\text{Cp}(\text{Me}_3\text{PO})(2,6\text{-Me}_2\text{C}_6\text{H}_3\text{NH})\text{Ti}=\text{N}(2,6\text{-Me}_2\text{C}_6\text{H}_3)$  (**6•OPMe<sub>3</sub>**).** A mixture of 5.9 mg (0.065 mmol) of trimethylphosphine oxide, 6.3 mg (0.038 mmol) of 1,3,5-trimethoxybenzene, and 30.2 mg (0.065 mmol) of **6•py** containing 20 mol% 2,6- $\text{Me}_2\text{C}_6\text{H}_3\text{NH}_2$  was stirred in 3 mL of toluene for 1 h, then concentrated *in vacuo* to a brown oil. The residue was redissolved in 3 mL of toluene, stirred an additional hour, and concentrated *in vacuo*. The residue was analyzed by  $^1\text{H}$  NMR spectroscopy; no **6•py** remained. The yield of **6•OPMe<sub>3</sub>** versus the internal standard was 90%. The identity of **6•OPMe<sub>3</sub>** was corroborated by independent synthesis (*vide infra*).

**$\text{Cp}(\text{Me}_3\text{PO})(2,6\text{-Me}_2\text{C}_6\text{H}_3\text{NH})\text{Ti}=\text{N}(2,6\text{-Me}_2\text{C}_6\text{H}_3)$  (**6•OPMe<sub>3</sub>**).** To a mixture of cyclopentadienyl titanium trichloride (57 mg, 0.26 mmol) and trimethylphosphine oxide (24 mg, 0.26 mmol) in 12 mL of THF at -35 °C was added a pre-cooled (-35 °C) solution of  $\text{LiNH}(2,6\text{-Me}_2\text{C}_6\text{H}_3)$  (99 mg, 0.78 mmol) in 2 mL of THF. The solution rapidly darkened from orange to greenish-brown, lightening at

the end of the addition. Over 2 h the trimethylphosphine oxide dissolved, again darkening the solution. After a reaction time of 2 h the mixture was concentrated *in vacuo* and the resulting residue was extracted with 10 mL of 1:1 toluene/pentane. The mixture was filtered and concentrated *in vacuo* to a brown oil. Unpurified yield = 145 mg (*ca.* quantitative for **6-OPMe<sub>3</sub>** plus 2,6-Me<sub>2</sub>C<sub>6</sub>H<sub>3</sub>NH<sub>2</sub>). <sup>1</sup>H NMR analysis of the unpurified reaction mixture showed only the desired product and 2,6-dimethylaniline. The residue was triturated with three 1 mL portions of cold pentane and concentrated *in vacuo* to a brown foam. Orange crystals suitable for X-ray diffraction were obtained from a saturated toluene solution layered with pentane (-35 °C). Yield = 42 mg (36%). IR (Nujol mull) 1622, 1587, 1461, 1406, 1307, 1258, 1231, 1105, 1014, 946, 858 cm<sup>-1</sup>; Anal. Calcd for C<sub>24</sub>H<sub>33</sub>N<sub>2</sub>OPTi: C, 64.86; H, 7.48; N, 6.30. Found C, 64.93; H, 7.60; N, 6.09.

**(2,6-Dimethylphenyl)-(1-methyl-2-phenylethylidene)amine (15).** A solution of 55 mg (0.45 mmol) of 2,6-dimethylaniline, 58 mg (0.50 mmol) of 1-phenyl-1,2-propadiene, and 13.5 mg (0.031 mmol) of (imido)titanium complex **6•py** in 3 mL of toluene was heated in a thick-walled glass vessel with Teflon stopcock at 90 °C for 24 h. The brown solution was cooled to 25 °C, diluted with 10 mL of hexanes, and treated with two drops of water to yield a flocculent precipitate. The solution was dried (MgSO<sub>4</sub>), filtered, and concentrated *in vacuo* to a brown oil that was purified by flash chromatography on silica gel (10-20% Et<sub>2</sub>O/petroleum ether) to afford 106 mg (0.43 mmol, 96%) of the title compound as a pale yellow oil: IR (CHCl<sub>3</sub>) 3011, 2953, 1660, 1593, 1469, 1366, 1245, 1217 cm<sup>-1</sup>; TLC (10% Et<sub>2</sub>O/hexanes) R<sub>f</sub> 0.19; Anal. Calcd for C<sub>17</sub>H<sub>19</sub>N: C, 86.03; H, 8.07; N, 5.90. Found C, 85.98; H, 8.18; N, 5.88.

**(2,6-Dimethylphenyl)-(1-methyloctylidene)amine (16).** A solution of 42 mg (0.35 mmol) of 2,6-dimethylaniline, 52 mg (0.42 mmol) of 1,2-nonadiene, and 15 mg (0.035 mmol) of (imido)titanium complex **6•py** in 3 mL of toluene was heated in a thick-walled glass vessel with Teflon stopcock at 90 °C for 48 h. The brown solution was cooled to 25 °C, diluted with 10 mL of hexanes, and treated with two drops of water to yield a flocculent precipitate. The mixture was dried (MgSO<sub>4</sub>), filtered, and concentrated *in vacuo* to a brown oil that was purified by flash chromatography on silica gel (5-8% Et<sub>2</sub>O/petroleum ether) to afford 73 mg (0.30 mmol, 85%) of the title compound as a clear oil: IR (CHCl<sub>3</sub>) 3011, 2956, 1661, 1467 cm<sup>-1</sup>; TLC (10% Et<sub>2</sub>O/hexanes) R<sub>f</sub> 0.40; Anal. Calcd for C<sub>17</sub>H<sub>27</sub>N: C, 83.20; H, 11.09; N, 5.71. Found C, 83.33; H, 10.94; N, 6.09.

**Cyclononylidene-(2,6-dimethylphenyl)amine (17).** A solution of 62 mg (0.51 mmol) of 2,6-dimethylaniline, 75 mg (0.61 mmol) of cyclononadiene, and 22 mg (0.05 mmol) of (imido)titanium complex **6•py** in 3 mL of toluene was heated in a thick-walled glass vessel with Teflon stopcock at 85 °C for 40 h. The brown solution was cooled to 25 °C, diluted with 10 mL of hexanes, and treated with two drops of water to yield a flocculent precipitate. The mixture was dried (MgSO<sub>4</sub>), filtered, and concentrated *in vacuo* to an orange oil that was purified by flash chromatography on silica gel (5-10% Et<sub>2</sub>O/petroleum ether) to afford 87 mg (0.36 mmol, 70%) of the title compound as a clear oil: IR (CHCl<sub>3</sub>) 3019, 2926, 1642, 1470, 1445, 1214, 781 cm<sup>-1</sup>; Anal. Calcd for C<sub>17</sub>H<sub>25</sub>N: C, 83.89; H, 10.35; N, 5.75. Found C, 84.29; H, 10.21; N, 5.83.

**Table S1. <sup>1</sup>H Spectroscopic Data (C<sub>6</sub>D<sub>6</sub>)**

| Compound                                                                                                                             | δ (ppm)                                                                                               | Multiplicity                      | J (Hz)                                            | Area                            |
|--------------------------------------------------------------------------------------------------------------------------------------|-------------------------------------------------------------------------------------------------------|-----------------------------------|---------------------------------------------------|---------------------------------|
| Isopropylidene-naphthalen-1-yl-amine<br>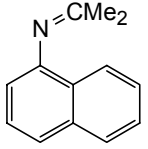            | 7.96<br>7.68<br>7.45<br>7.30-7.25<br>6.65<br>1.96<br>1.30                                             | dd<br>dd<br>d<br>m<br>d<br>s<br>s | 6.5, 3.3<br>6.5, 3.3<br>8.2<br>-<br>7.2<br>-<br>- | 1<br>1<br>1<br>3<br>1<br>3<br>3 |
| <i>N'</i> -Isopropylidene- <i>N,N</i> -dimethylhydrazine<br><br>Me <sub>2</sub> C=NNMe <sub>2</sub>                                  | 2.39<br>1.73<br>1.70                                                                                  | s<br>s<br>s                       | -<br>-<br>-                                       | 6<br>3<br>3                     |
| Isopropylidene- <i>p</i> -tolyl-amine<br>           | 6.99<br>6.67<br>2.14<br>1.88<br>1.42                                                                  | d<br>d<br>s<br>s<br>s             | 8.0<br>8.0<br>-<br>-<br>-                         | 2<br>2<br>3<br>3<br>3           |
| <i>tert</i> -Butyl-isopropylidene-amine<br><br>Me <sub>2</sub> C=NCMe <sub>3</sub>                                                   | 1.83<br>1.52<br>1.26                                                                                  | s<br>s<br>s                       | -<br>-<br>-                                       | 3<br>3<br>9                     |
| Isopropylidene-(1-phenylethyl)-amine<br>          | 7.47<br>7.21<br>7.09<br>4.42<br>1.82<br>1.44<br>1.36                                                  | d<br>t<br>t<br>q<br>s<br>d<br>s   | 7.6<br>7.6<br>7.6<br>6.4<br>-<br>6.4<br>-         | 2<br>2<br>1<br>1<br>3<br>3<br>3 |
| Isopropylidene-(4-trifluoromethylphenyl)amine<br> | 7.33<br>6.46<br>1.79<br>1.20                                                                          | d<br>d<br>s<br>s                  | 8.0<br>8.0<br>-<br>-                              | 2<br>2<br>3<br>3                |
| Isopropylidene-(4-methoxyphenyl)amine<br>         | 6.78<br>6.66<br>3.34<br>1.90<br>1.44                                                                  | dt<br>dt<br>s<br>s<br>s           | 8.8, 2.4<br>8.8, 2.4<br>-<br>-<br>-               | 2<br>2<br>3<br>3<br>3           |
| (2,6-Dimethylphenyl)-(1-methyl-2-phenylethylidene)amine ( <b>15</b> )                                                                | 7.23 ( <i>E</i> )<br>7.15 ( <i>E</i> )<br>7.07 ( <i>E</i> )<br>6.99 ( <i>E</i> )<br>6.90 ( <i>E</i> ) | d<br>t<br>t<br>d<br>dd            | 7.2<br>7.2<br>7.2<br>7.6<br>8.0, 6.8              | 2<br>2<br>1<br>2<br>1           |

|                                                                                                                                                                                                                 |                                                                                                                                                                                                |                                                                                                       |                                                                                                                  |                                                                                                    |
|-----------------------------------------------------------------------------------------------------------------------------------------------------------------------------------------------------------------|------------------------------------------------------------------------------------------------------------------------------------------------------------------------------------------------|-------------------------------------------------------------------------------------------------------|------------------------------------------------------------------------------------------------------------------|----------------------------------------------------------------------------------------------------|
| <p>15, cont.</p> 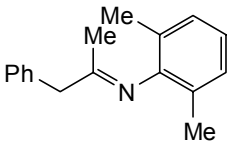                                                                                                              | <p>(<i>Z</i>) aromatic protons not well-resolved</p> <p>3.55 (<i>E</i>)</p> <p>3.04 (<i>Z</i>)</p> <p>2.05 (<i>Z</i>)</p> <p>2.00 (<i>E</i>)</p> <p>1.96 (<i>Z</i>)</p> <p>1.25 (<i>E</i>)</p> | <p>s</p> <p>s</p> <p>s</p> <p>s</p> <p>s</p> <p>s</p>                                                 | <p>-</p> <p>-</p> <p>-</p> <p>-</p> <p>-</p> <p>-</p>                                                            | <p>2</p> <p>2</p> <p>6</p> <p>6</p> <p>3</p> <p>3</p>                                              |
| <p>Cyclononylidene-(2,6-dimethylphenyl)amine (<b>17</b>)</p>                                                                   | <p>6.99</p> <p>6.86</p> <p>2.62</p> <p>2.11</p> <p>2.07</p> <p>1.97</p> <p>1.68</p> <p>1.68-1.48</p>                                                                                           | <p>d</p> <p>t</p> <p>m</p> <p>m</p> <p>s</p> <p>m</p> <p>m</p> <p>m</p>                               | <p>7.6</p> <p>7.2</p> <p>-</p> <p>-</p> <p>-</p> <p>-</p> <p>-</p> <p>-</p>                                      | <p>2</p> <p>1</p> <p>2</p> <p>2</p> <p>6</p> <p>2</p> <p>2</p> <p>8</p>                            |
| <p>(2,6-Dimethylphenyl)-(1-methyloctylidene)amine (<b>16</b>)</p>                                                             | <p>7.02 (<i>E</i>)</p> <p>6.91 (<i>E</i>)</p> <p>2.23 (<i>E</i>)</p> <p>2.00 (<i>E</i>)</p> <p>1.67 (<i>E</i>)</p> <p>1.30 (<i>E</i>)</p> <p>1.35-0.82 (<i>E</i>)</p>                          | <p>d</p> <p>t</p> <p>t</p> <p>s</p> <p>quintet</p> <p>s</p> <p>m</p>                                  | <p>7.2</p> <p>7.2</p> <p>7.5</p> <p>-</p> <p>7.4</p> <p>-</p> <p>-</p>                                           | <p>2</p> <p>1</p> <p>2</p> <p>6</p> <p>2</p> <p>3</p> <p>13</p>                                    |
| <p>Cp(py)(ArNH)Ti=NAr (<b>6•py</b>)<br/>(Ar = 2,6-Me<sub>2</sub>C<sub>6</sub>H<sub>3</sub>)</p>                              | <p>9.00</p> <p>8.73</p> <p>7.12</p> <p>7.02</p> <p>6.87</p> <p>6.73</p> <p>6.69</p> <p>6.32</p> <p>6.01</p> <p>2.30</p> <p>2.19</p>                                                            | <p>br s</p> <p>d</p> <p>d</p> <p>d</p> <p>t</p> <p>t</p> <p>t</p> <p>t</p> <p>s</p> <p>s</p> <p>s</p> | <p>-</p> <p>4.8</p> <p>7.2</p> <p>7.6</p> <p>7.6</p> <p>7.2</p> <p>7.6</p> <p>7.6</p> <p>-</p> <p>-</p> <p>-</p> | <p>1</p> <p>2</p> <p>2</p> <p>2</p> <p>1</p> <p>1</p> <p>1</p> <p>2</p> <p>5</p> <p>6</p> <p>6</p> |
| <p>Cp(Me<sub>3</sub>PO)(ArNH)Ti=NAr (<b>6•OPMe<sub>3</sub></b>)<br/>(Ar = 2,6-Me<sub>2</sub>C<sub>6</sub>H<sub>3</sub>)</p>  | <p>8.30</p> <p>7.22</p> <p>7.09</p> <p>6.91</p> <p>6.75</p> <p>6.07</p> <p>2.62</p> <p>2.35</p> <p>0.76</p>                                                                                    | <p>s</p> <p>d</p> <p>d</p> <p>t</p> <p>t</p> <p>s</p> <p>s</p> <p>s</p> <p>d</p>                      | <p>-</p> <p>7.2</p> <p>7.2</p> <p>7.2</p> <p>7.2</p> <p>-</p> <p>-</p> <p>-</p> <p>13.2</p>                      | <p>1</p> <p>2</p> <p>2</p> <p>1</p> <p>1</p> <p>5</p> <p>6</p> <p>6</p> <p>9</p>                   |

**Table S2.  $^{13}\text{C}\{^1\text{H}\}$  Spectroscopic Data ( $\text{C}_6\text{D}_6$ )**

| Compound                                                              | $\delta$ (ppm)     | assignment    |
|-----------------------------------------------------------------------|--------------------|---------------|
| Isopropylidene-naphthalen-1-yl-amine                                  | 168.7              | C             |
|                                                                       | 148.8              | C             |
|                                                                       | 134.8              | C             |
|                                                                       | 128.3              | CH            |
|                                                                       | 126.7              | C             |
|                                                                       | 126.3              | CH            |
|                                                                       | 126.2              | CH            |
|                                                                       | 125.5              | CH            |
|                                                                       | 124.0              | CH            |
|                                                                       | 123.2              | CH            |
|                                                                       | 113.8              | CH            |
|                                                                       | 28.1               | $\text{CH}_3$ |
|                                                                       | 20.3               | $\text{CH}_3$ |
| <i>N'</i> -Isopropylidene- <i>N,N</i> -dimethylhydrazine              | 163.0              | DEPT not done |
|                                                                       | 47.1               | done          |
|                                                                       | 24.8               |               |
|                                                                       | 17.5               |               |
| Isopropylidene- <i>p</i> -tolyl-amine                                 | 167.1              | C             |
|                                                                       | 150.0              | C             |
|                                                                       | 132.0              | C             |
|                                                                       | 129.7              | CH            |
|                                                                       | 119.8              | CH            |
|                                                                       | 28.3               | $\text{CH}_3$ |
|                                                                       | 20.8               | $\text{CH}_3$ |
|                                                                       | 19.8               | $\text{CH}_3$ |
| <i>tert</i> -Butyl-isopropylidene-amine                               | 161.8              | DEPT not done |
|                                                                       | 54.5               | done          |
|                                                                       | 31.2               |               |
|                                                                       | 30.7               |               |
|                                                                       | 21.3               |               |
| Isopropylidene-(1-phenylethyl)-amine                                  | 163.5              | C             |
|                                                                       | 147.0              | C             |
|                                                                       | 128.5              | CH            |
|                                                                       | 127.1              | CH            |
|                                                                       | 126.7              | CH            |
|                                                                       | 59.8               | CH            |
|                                                                       | 29.3               | $\text{CH}_3$ |
|                                                                       | 25.6               | $\text{CH}_3$ |
|                                                                       | 17.6               | $\text{CH}_3$ |
| (2,6-Dimethylphenyl)-(1-methyl-2-phenylethylidene)amine ( <b>15</b> ) | 169.2 ( <i>E</i> ) | C             |
|                                                                       | 167.8 ( <i>Z</i> ) | C             |
|                                                                       | 149.4 ( <i>E</i> ) | C             |
|                                                                       | 149.1 ( <i>Z</i> ) | C             |
|                                                                       | 137.8 ( <i>E</i> ) | C             |



|                                                                                                                                  |                           |                 |
|----------------------------------------------------------------------------------------------------------------------------------|---------------------------|-----------------|
| Cp(py)(ArNH)Ti=NAr<br>( <b>6•py</b> )<br>(Ar = 2,6-Me <sub>2</sub> C <sub>6</sub> H <sub>3</sub> )                               | 159.6                     | C               |
|                                                                                                                                  | 156.7                     | C               |
|                                                                                                                                  | 151.8 (br)                | CH              |
|                                                                                                                                  | 138.5 (br)                | CH              |
|                                                                                                                                  | 131.0                     | C               |
|                                                                                                                                  | 127.6                     | CH              |
|                                                                                                                                  | 126.5                     | C               |
|                                                                                                                                  | 123.9 (br)                | CH              |
|                                                                                                                                  | 119.7                     | CH              |
|                                                                                                                                  | 119.3                     | CH              |
|                                                                                                                                  | 111.4                     | CH              |
|                                                                                                                                  | 110.5                     | CH              |
|                                                                                                                                  | 20.5                      | CH <sub>3</sub> |
| 20.0                                                                                                                             | CH <sub>3</sub>           |                 |
| Cp(Me <sub>3</sub> PO)(ArNH)Ti=NAr<br>( <b>6•OPMe<sub>3</sub></b> )<br>(Ar = 2,6-Me <sub>2</sub> C <sub>6</sub> H <sub>3</sub> ) | 159.5                     | C               |
|                                                                                                                                  | 158.1                     | C               |
|                                                                                                                                  | 131.8                     | C               |
|                                                                                                                                  | 128.6                     | CH              |
|                                                                                                                                  | 127.9                     | CH              |
|                                                                                                                                  | 126.2                     | C               |
|                                                                                                                                  | 118.8                     | CH              |
|                                                                                                                                  | 118.7                     | CH              |
|                                                                                                                                  | 110.4                     | CH              |
|                                                                                                                                  | 20.7 (d, <i>J</i> = 2 Hz) | CH <sub>3</sub> |
|                                                                                                                                  | 15.6                      | CH <sub>3</sub> |
|                                                                                                                                  | 14.8                      | CH <sub>3</sub> |



## V. Kinetic Studies of Allene Hydroamination Catalyzed by **6•py**.

**A. Preparation of stock solutions.** Stock solution #1 was prepared by dissolution of 1.45 g (12.0 mmol) of 2,6-dimethylaniline, 38.8 mg (0.09 mmol) of (imido)Ti complex **6•py**, and 47.6 mg (0.28 mmol) of 1,3,5-trimethoxybenzene in C<sub>6</sub>D<sub>6</sub> in a 5.0 ± 0.05 mL volumetric flask ([ArNH<sub>2</sub>] = 2.75 M, [1,3,5-C<sub>6</sub>H<sub>3</sub>(OMe)<sub>3</sub>] = 0.056 M).

Stock solution #2 was prepared by dissolution of 395 mg (4.99 mmol) of pyridine in 5.0 mL of C<sub>6</sub>D<sub>6</sub> in a 5.0 mL volumetric flask ([py] = 0.999 M).

Stock solution #3 was prepared by condensation of 238 torr x 138 mL of allene onto a frozen (77 K) solution of 31 mg of dimethylzirconocene in *ca.* 2 mL of C<sub>6</sub>D<sub>6</sub>. The allene concentration of this solution was determined in the following manner: to a solution of 6.4 mg (0.038 mmol) of 1,3,5-trimethoxybenzene in *ca.* 0.4 mL of C<sub>6</sub>D<sub>6</sub> was added via syringe 100 μL of stock solution #3. A single-pulse <sup>1</sup>H NMR spectrum was acquired and the Ar-*H* (δ 6.24) and H<sub>2</sub>C=C=CH<sub>2</sub> (δ 4.49) resonances were integrated, giving the ratio of C<sub>3</sub>H<sub>4</sub>:1,3,5-C<sub>6</sub>H<sub>3</sub>(OMe)<sub>3</sub> = 0.69; thus, [C<sub>3</sub>H<sub>4</sub>] = (0.038 mmol)(0.69)/0.100 mL = 0.26 M. Reactions conducted in the absence of Cp<sub>2</sub>ZrMe<sub>2</sub> as an internal desiccant were plagued by irreproducible concentrations of **6•py**, presumably due to decomposition induced by traces of moisture and/or oxygen. The stock solutions were stored at -35 °C.

Stock solution #4 was prepared by dissolution of 49.0 mg of imidotitanium complex **6•py** in C<sub>6</sub>D<sub>6</sub> in a 1.00 ± 0.01 mL volumetric flask.

Stock solution #5 was prepared by adding 100 μL of stock solution #2 to a 1.00 ± 0.01 mL volumetric flask containing 34.5 mg (0.205 mmol) of 1,3,5-trimethoxybenzene. C<sub>6</sub>D<sub>6</sub> was added to bring the final volume to 1.00 mL.

**B. Determination of order in [6•py] (Table S3).** In a typical run a 1.00 ± 0.01 mL volumetric flask was charged with 167 mg (1.38 mmol) of 2,6-dimethylaniline, 346 μL of stock solution #3, 91 μL of stock solution #5, and a volume of stock solution #4 that provided the desired concentration of **6•py** (Table S3). C<sub>6</sub>D<sub>6</sub> was added to bring the total volume to 1.00 mL and the solution was transferred to an NMR tube, fitted with a Cajon ultratorr adapter, frozen, and flame-sealed under dynamic vacuum. The tube was inserted into a Bruker AMX 300 MHz NMR spectrometer whose probe temperature had been calibrated immediately beforehand employing a neat ethylene glycol standard. Single-pulse <sup>1</sup>H NMR spectra were acquired at regular time intervals (typically 60-240 s) through at least five half-lives; the disappearance of allene with time was monitored. Absolute reactant, product, and catalyst concentrations were obtained by integration comparison with the internal standard. Within experimental error, [6•py] was constant throughout each run.

**C. Determination of order in [ArNH<sub>2</sub>] (a) Conditions of excess [ArNH<sub>2</sub>] (Table S4).** In a typical run a 1.00 ± 0.01 mL volumetric flask was charged with a quantity of 2,6-dimethylaniline that varied with the run (run 5: 109.0 mg; run 6: 135.2 mg; run 7: 189.7 mg), 335 μL of stock solution #3, 91 μL of stock solution #5, and 79 μL of stock solution #4. C<sub>6</sub>D<sub>6</sub> was added to bring the final volume to 1.00 mL. At this point, the sample was prepared and the kinetic run was performed as described in section B.

**D. Determination of order in [ArNH<sub>2</sub>] (b) Confirmation by method of initial rates (Table S5).** A 1.00 ± 0.01 mL volumetric flask was charged with a quantity of 2,6-dimethylaniline that varied with the run (run 8: 5.8 mg; run 9: 19.4 mg), 335 μL of stock solution #3, 91 μL of stock solution #5, and 90 μL of stock solution #4. C<sub>6</sub>D<sub>6</sub> was added to bring the final volume to 1.00 mL and the sample was

prepared as described in section B. Absolute reactant, product, and catalyst concentrations were obtained by integration comparison with the internal standard. Reaction progress (growth of imine product) was followed to 15% conversion versus the limiting reagent. A plot of  $[\text{ArN}=\text{CMe}_2]$  versus time was linear in this region; the slope provided the initial rate constant  $k_{\text{obs}}$ .

**E. Determination of order in [py] (Table S6).** In a typical run a  $1.00 \pm 0.01$  mL volumetric flask was charged with 500  $\mu\text{L}$  of stock solution #1, 346  $\mu\text{L}$  of stock solution #3, and a volume of stock solution #2 that provided the desired concentration of pyridine (Table S6).  $\text{C}_6\text{D}_6$  was added to bring the final volume to 1.00 mL and the solution was transferred to an NMR tube, fitted with a Cajon ultratorr adapter, frozen, and flame-sealed under dynamic vacuum. The kinetic run was performed as described in section B.

**Table S3. Dependence of  $k_{\text{obs}}$  on [6•py]**

| Run ( $65.0 \pm 0.2$ °C) | [6•py] $\times 10^3$ (M) | [2,6-Me <sub>2</sub> C <sub>6</sub> H <sub>3</sub> NH <sub>2</sub> ] <sub>0</sub> (M) | [H <sub>2</sub> C=C=CH <sub>2</sub> ] <sub>0</sub> (M) | [py] (M) | $k_{\text{obs}} \times 10^4$ (M <sup>-1</sup> s <sup>-1</sup> ) |
|--------------------------|--------------------------|---------------------------------------------------------------------------------------|--------------------------------------------------------|----------|-----------------------------------------------------------------|
| 1                        | 3.97                     | 1.38                                                                                  | 0.072                                                  | 0.009    | $8.4 \pm 0.2$                                                   |
| 2                        | 4.48                     | 1.38                                                                                  | 0.09                                                   | 0.009    | $10.1 \pm 0.2$                                                  |
| 3                        | 8.49                     | 1.38                                                                                  | 0.09                                                   | 0.009    | $19.8 \pm 0.2$                                                  |
| 4                        | 11.50                    | 1.38                                                                                  | 0.09                                                   | 0.009    | $25.2 \pm 0.3$                                                  |

$$\text{rate} = -d[\text{H}_2\text{C}=\text{C}=\text{CH}_2]/dt = k_{\text{obs}}[\text{H}_2\text{C}=\text{C}=\text{CH}_2] \quad (1)$$

$$k = k_{\text{obs}}[\text{py}][\text{6•py}]^{-1} \quad (2)$$

$$k (65.0 \pm 0.2 \text{ °C}) = (2.00 \pm 0.09) \times 10^{-3} \text{ M}^{-1}\text{s}^{-1} \quad (3)$$

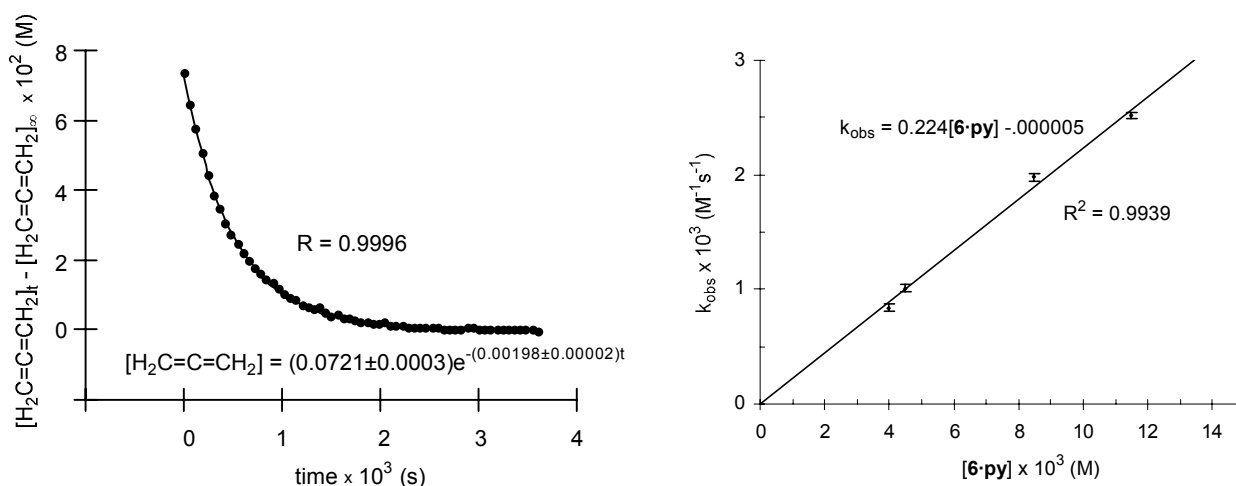

**Figure S1.** Representative exponential decay plot, run #3 (left); plot of [6•py] versus  $k_{\text{obs}}$  (right).

**Table S4. Dependence of  $k_{\text{obs}}$  on  $[\text{ArNH}_2]$  (conditions of excess  $[\text{ArNH}_2]$ )**

| Run (65.0 ± 0.2 °C) | $[\text{ArNH}_2]_0$ (M) | $[\text{H}_2\text{C}=\text{C}=\text{CH}_2]_0$ (M) | $[\text{py}]$ (M) | $[\mathbf{6}\cdot\text{py}] \times 10^3$ (M) | $k_{\text{obs}} \times 10^4$ ( $\text{M}^{-1}\text{s}^{-1}$ ) |
|---------------------|-------------------------|---------------------------------------------------|-------------------|----------------------------------------------|---------------------------------------------------------------|
| 5                   | 0.90                    | 0.09                                              | 0.009             | 4.8                                          | 6.90 ± 0.16                                                   |
| 6                   | 1.13                    | 0.09                                              | 0.009             | 4.8                                          | 7.14 ± 0.13                                                   |
| 7                   | 1.57                    | 0.09                                              | 0.009             | 4.4                                          | 7.47 ± 0.22                                                   |

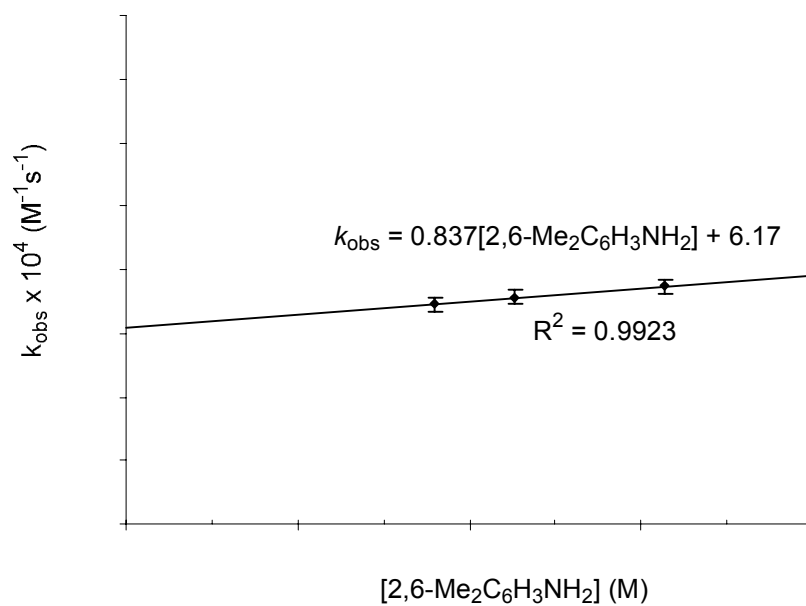**Figure S2.** Plot of  $[2,6\text{-Me}_2\text{C}_6\text{H}_3\text{NH}_2]$  versus  $k_{\text{obs}}$ .

**Table S5. Dependence of  $k_{\text{obs}}$  on  $[\text{ArNH}_2]$  (method of initial rates)**

| Run ( $51.0 \pm 0.2$ °C) | $[\text{ArNH}_2]_0$ (M) | $[\text{H}_2\text{C}=\text{C}=\text{CH}_2]_0$ (M) | $[\text{py}]$ (M) | $[\mathbf{6\cdot py}] \times 10^3$ (M) | $k_{\text{obs}} \times 10^5$ ( $\text{M}^{-1}\text{s}^{-1}$ ) |
|--------------------------|-------------------------|---------------------------------------------------|-------------------|----------------------------------------|---------------------------------------------------------------|
| 8                        | 0.069                   | 0.113                                             | 0.009             | 5.7                                    | $1.84 \pm 0.02$                                               |
| 9                        | 0.178                   | 0.110                                             | 0.009             | 5.6                                    | $1.96 \pm 0.02$                                               |

$$[\text{ArNH}_2]_0 (\text{run 9}) / [\text{ArNH}_2]_0 (\text{run 8}) = 2.58 \quad (\text{S4})$$

$$k_{\text{obs}} (\text{run 9}) / k_{\text{obs}} (\text{run 8}) = 1.07 \pm 0.03 \quad (\text{S5})$$

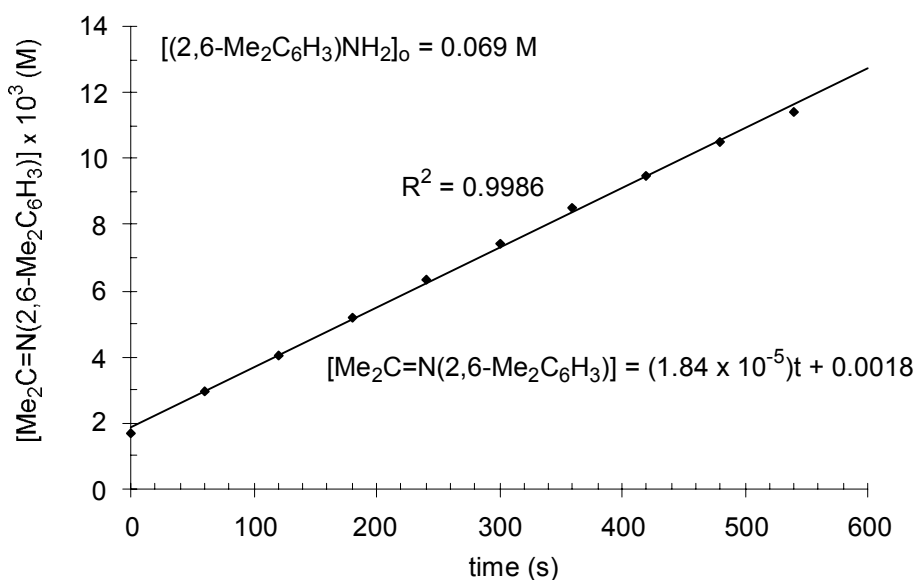**Figure S3.** Initial rates study (to 15% conversion), Run #8; plot of  $[\text{Me}_2\text{C}=\text{N}(2,6\text{-Me}_2\text{C}_6\text{H}_3)]$  vs time.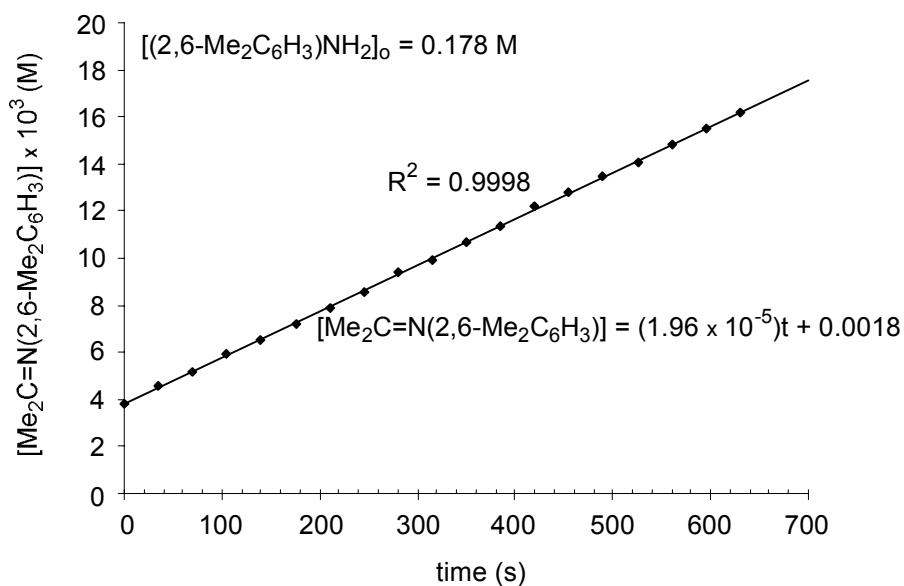**Figure S4.** Initial rates study (to 15% conversion), Run #9; plot of  $[\text{Me}_2\text{C}=\text{N}(2,6\text{-Me}_2\text{C}_6\text{H}_3)]$  vs time.

**Table S6. Dependence of  $k_{\text{obs}}$  on  $[\text{py}]^{-1}$** 

| Run ( $65 \pm 0.2$ °C) | $[\text{ArNH}_2]_0$ (M) | $[\text{H}_2\text{C}=\text{C}=\text{CH}_2]_0$ (M) | $[\text{py}]$ (M) | $[\mathbf{6}\cdot\text{py}] \times 10^3$ (M) | $k_{\text{obs}} \times 10^4$ ( $\text{M}^{-1}\text{s}^{-1}$ ) |
|------------------------|-------------------------|---------------------------------------------------|-------------------|----------------------------------------------|---------------------------------------------------------------|
| 10                     | 1.38                    | 0.09                                              | 0.009             | 5.0                                          | $11.17 \pm 0.33$                                              |
| 11                     | 1.38                    | 0.09                                              | 0.018             | 5.0                                          | $5.25 \pm 0.09$                                               |
| 12                     | 1.38                    | 0.09                                              | 0.027             | 5.0                                          | $3.52 \pm 0.05$                                               |
| 13                     | 1.38                    | 0.09                                              | 0.036             | 5.0                                          | $2.81 \pm 0.05$                                               |

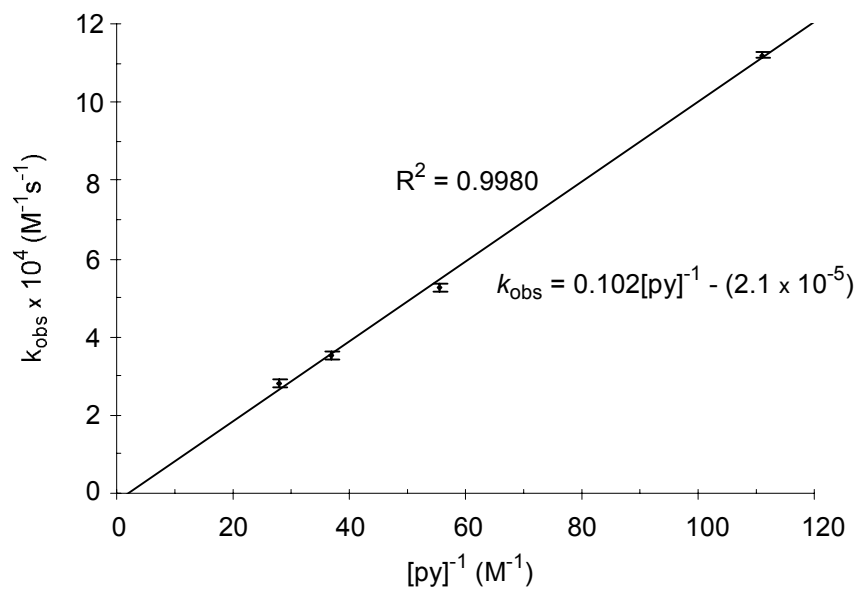**Figure S5.** Plot of  $k_{\text{obs}}$  versus  $[\text{py}]^{-1}$ .



Table S7. Crystal Data for  $6 \cdot \text{OPMe}_3 \cdot (\text{C}_5\text{H}_{12})_{0.25}$ .

A. Crystal Data

|                      |                                                         |
|----------------------|---------------------------------------------------------|
| Empirical Formula    | TiPON <sub>2</sub> C <sub>25.25</sub> H <sub>38</sub>   |
| Formula Weight       | 464.46                                                  |
| Crystal Color, Habit | Yellow, prism                                           |
| Crystal Dimensions   | 0.28 x 0.22 x 0.06 mm                                   |
| Crystal System       | orthorhombic                                            |
| Lattice Type         | Primitive                                               |
| Lattice Parameters   | a = 27.715(2) Å<br>b = 13.2652(9) Å<br>c = 14.5729(9) Å |
| Space Group          | Pbcn (#60)                                              |
| Z value              | 8                                                       |
| D <sub>calc</sub>    | 1.144 g/cm <sup>3</sup>                                 |
| F <sub>000</sub>     | 1988.00                                                 |
| μ (MoKα)             | 3.94 cm <sup>-1</sup>                                   |

B. Intensity Measurements

|                             |                                                              |
|-----------------------------|--------------------------------------------------------------|
| Diffractometer              | SMART CCD                                                    |
| Radiation                   | MoKα (λ = 0.71069 Å)                                         |
| Detector Position           | 60.00 mm                                                     |
| Exposure Time               | 10.0 seconds per frame                                       |
| Scan Type                   | ω (0.3 degrees per frame)                                    |
| 2θ <sub>max</sub>           | 46.5°                                                        |
| No. of Reflections Measured | Total: 20747<br>Unique: 4305 (R <sub>int</sub> = 0.091)      |
| Corrections                 | Lorentz-polarization<br>Absorption (Tmax = 0.98 Tmin = 0.87) |

C. Structure Solution and Refinement

|                                                 |                                                                     |
|-------------------------------------------------|---------------------------------------------------------------------|
| Structure Solution                              | Direct Methods (SIR92)                                              |
| Refinement                                      | Full-matrix least-squares                                           |
| Function Minimized                              | $\Sigma \omega ( F_o  -  F_c )^2$                                   |
| Least Squares Weights                           | $\omega = 1/\sigma^2(F_o) = [\sigma_c^2(F_o) + (p^2/4) F_o^2]^{-1}$ |
| p-factor                                        | 0.0300                                                              |
| Anomalous Dispersion                            | All non-hydrogen atoms                                              |
| No. Observations (I > 3.00σ(I))                 | 1756                                                                |
| No. Variables                                   | 141                                                                 |
| Reflection/Parameter Ratio                      | 12.45                                                               |
| Residuals: R; R <sub>w</sub> ; R <sub>all</sub> | 0.064; 0.086; 0.133                                                 |
| Goodness of Fit Indicator                       | 2.69                                                                |
| Max Shift/Error in Final Cycle                  | 0.00                                                                |
| Maximum peak in Final Diff. Map                 | 0.55 e <sup>-</sup> /Å <sup>3</sup>                                 |
| Minimum peak in Final Diff. Map                 | -0.29 e <sup>-</sup> /Å <sup>3</sup>                                |

Table S8. Atomic coordinates and  $B_{iso}/B_{eq}$  and occupancy

| atom   | x          | y         | z         | B       | occ   |
|--------|------------|-----------|-----------|---------|-------|
| Ti(1)  | 0.60281(7) | 0.3513(1) | 0.1350(1) | 2.28(5) |       |
| P(1)   | 0.6257(1)  | 0.3299(2) | 0.3515(2) | 2.82(8) |       |
| O(1)   | 0.5973(2)  | 0.3048(4) | 0.2654(4) | 2.4257  |       |
| N(1)   | 0.6290(3)  | 0.4708(6) | 0.1470(5) | 2.0485  |       |
| N(2)   | 0.6579(3)  | 0.2735(6) | 0.0868(6) | 2.6244  |       |
| C(1)   | 0.5225(4)  | 0.2737(8) | 0.1240(8) | 3.3(3)  |       |
| C(2)   | 0.5179(4)  | 0.3762(8) | 0.1215(7) | 3.3(3)  |       |
| C(3)   | 0.5409(4)  | 0.4112(8) | 0.0407(8) | 3.3(3)  |       |
| C(4)   | 0.5587(4)  | 0.3269(8) | 0.0043(7) | 2.9(3)  |       |
| C(5)   | 0.5478(4)  | 0.2424(8) | 0.0484(8) | 3.0(3)  |       |
| C(6)   | 0.6210(4)  | 0.4584(8) | 0.3828(7) | 4.1(3)  |       |
| C(7)   | 0.6032(4)  | 0.2566(8) | 0.4424(8) | 3.7(3)  |       |
| C(8)   | 0.6882(5)  | 0.3053(9) | 0.3385(8) | 5.0(3)  |       |
| C(9)   | 0.6445(4)  | 0.5693(7) | 0.1495(6) | 1.9(2)  |       |
| C(10)  | 0.6146(4)  | 0.6481(8) | 0.1792(6) | 2.2(2)  |       |
| C(11)  | 0.6313(4)  | 0.7461(8) | 0.1824(7) | 2.7(2)  |       |
| C(12)  | 0.6785(4)  | 0.7679(8) | 0.1552(7) | 3.3(3)  |       |
| C(13)  | 0.7078(4)  | 0.6911(8) | 0.1255(7) | 3.1(3)  |       |
| C(14)  | 0.6916(4)  | 0.5905(8) | 0.1224(7) | 2.4(2)  |       |
| C(15)  | 0.5635(4)  | 0.6301(8) | 0.2057(7) | 3.6(3)  |       |
| C(16)  | 0.7236(4)  | 0.5090(9) | 0.0902(8) | 4.1(3)  |       |
| C(17)  | 0.6621(4)  | 0.1872(8) | 0.0328(7) | 2.2(2)  |       |
| C(18)  | 0.6803(4)  | 0.1916(8) | 0.0579(7) | 2.6(2)  |       |
| C(19)  | 0.6824(4)  | 0.1046(8) | 0.1100(7) | 3.3(3)  |       |
| C(20)  | 0.6678(4)  | 0.0149(8) | 0.0758(8) | 3.6(3)  |       |
| C(21)  | 0.6500(4)  | 0.0081(8) | 0.0130(7) | 3.1(3)  |       |
| C(22)  | 0.6479(4)  | 0.0940(8) | 0.0680(7) | 2.5(2)  |       |
| C(23)  | 0.6955(4)  | 0.2912(8) | 0.0953(7) | 3.4(3)  |       |
| C(24)  | 0.6333(4)  | 0.0837(8) | 0.1662(7) | 3.6(3)  |       |
| C(25)  | 0.5000     | 0.088(3)  | 0.2500    | 5(1)    | 1/4   |
| C(26)  | 0.516(2)   | 0.008(4)  | 0.208(3)  | 4(1)    | 1/4   |
| C(27)  | 0.530(1)   | 0.019(2)  | 0.128(2)  | 7.9(9)  | 1/2   |
| C(28)  | 0.494(2)   | 0.074(3)  | 0.167(3)  | 4(1)    | 1/4   |
| C(100) | 0.5375     | 0.3261    | 0.0661    | 0.2000  | 0.000 |
| H(1)   | 0.677(3)   | 0.315(6)  | 0.070(6)  | 3.4473  |       |
| H(2)   | 0.5098     | 0.2377    | 0.1712    | 4.6154  |       |
| H(3)   | 0.5028     | 0.4215    | -0.1686   | 3.7059  |       |
| H(4)   | 0.5413     | 0.4817    | -0.0217   | 3.7313  |       |
| H(5)   | 0.5772     | 0.3333    | 0.0613    | 3.4273  |       |
| H(6)   | 0.5572     | 0.1753    | -0.0314   | 3.8543  |       |
| H(7)   | 0.6305     | 0.5003    | -0.3382   | 4.6386  |       |
| H(8)   | 0.6379     | 0.4690    | -0.4391   | 4.6386  |       |
| H(9)   | 0.5864     | 0.4713    | -0.3978   | 4.6386  |       |
| H(10)  | 0.5697     | 0.2710    | -0.4570   | 4.0817  |       |
| H(11)  | 0.6206     | 0.2710    | -0.5008   | 4.0817  |       |
| H(12)  | 0.6061     | 0.1859    | -0.4338   | 4.0817  |       |
| H(13)  | 0.6935     | 0.2319    | -0.3250   | 5.9001  |       |
| H(14)  | 0.7064     | 0.3177    | -0.3925   | 5.9001  |       |
| H(15)  | 0.7025     | 0.3403    | -0.2890   | 5.9001  |       |
| H(16)  | 0.6093     | 0.8023    | -0.2025   | 3.6790  |       |
| H(17)  | 0.6909     | 0.8390    | -0.1580   | 3.9526  |       |
| H(18)  | 0.7414     | 0.7081    | -0.1069   | 3.4991  |       |
| H(19)  | 0.5415     | 0.6255    | -0.1512   | 3.8644  |       |
| H(20)  | 0.5486     | 0.6808    | -0.2434   | 3.8644  |       |



|       |        |         |         |        |
|-------|--------|---------|---------|--------|
| H(21) | 0.5587 | 0.5661  | -0.2362 | 3.8644 |
| H(22) | 0.7122 | 0.4746  | -0.0356 | 5.2984 |
| H(23) | 0.7300 | 0.4582  | -0.1347 | 5.2984 |
| H(24) | 0.7566 | 0.5338  | -0.0716 | 5.2984 |
| H(25) | 0.6944 | 0.1119  | 0.1729  | 3.7954 |
| H(26) | 0.6683 | -0.0452 | 0.1148  | 3.7540 |
| H(27) | 0.6419 | -0.0572 | -0.0371 | 4.0995 |
| H(28) | 0.7215 | 0.3174  | 0.0597  | 3.8264 |
| H(29) | 0.7078 | 0.2830  | 0.1574  | 3.8264 |
| H(30) | 0.6699 | 0.3369  | 0.0967  | 3.8264 |
| H(31) | 0.6605 | 0.0977  | -0.2085 | 3.6158 |
| H(32) | 0.6088 | 0.1341  | -0.1850 | 3.6158 |
| H(33) | 0.6209 | 0.0200  | -0.1830 | 3.6158 |

Table S9. Anisotropic Displacement Parameters

| atom  | U <sub>11</sub> | U <sub>22</sub> | U <sub>33</sub> | U <sub>12</sub> | U <sub>13</sub> | U <sub>23</sub> |
|-------|-----------------|-----------------|-----------------|-----------------|-----------------|-----------------|
| Ti(1) | 0.023(1)        | 0.036(1)        | 0.027(1)        | 0.003(1)        | 0.001(1)        | -0.004(1)       |
| P(1)  | 0.032(2)        | 0.042(2)        | 0.033(2)        | 0.001(2)        | 0.004(2)        | 0.002(2)        |
| O(1)  | 0.0307          | 0.0307          | 0.0307          | 0.0000          | 0.0000          | 0.0000          |
| N(1)  | 0.0259          | 0.0259          | 0.0259          | 0.0000          | 0.0000          | 0.0000          |
| N(2)  | 0.0332          | 0.0332          | 0.0332          | 0.0000          | 0.0000          | 0.0000          |

Table S10. Bond Lengths (Å)

| atom | atom | distance | atom | atom | distance |
|------|------|----------|------|------|----------|
| TI1  | O1   | 2.017(6) | TI1  | N1   | 1.752(8) |
| TI1  | N2   | 1.975(9) | TI1  | C1   | 2.46(1)  |
| TI1  | C2   | 2.38(1)  | TI1  | C3   | 2.34(1)  |
| TI1  | C4   | 2.40(1)  | TI1  | C5   | 2.46(1)  |
| TI1  | C100 | 2.099(2) | P1   | O1   | 1.524(7) |
| P1   | C6   | 1.77(1)  | P1   | C7   | 1.76(1)  |
| P1   | C8   | 1.77(1)  | N1   | C9   | 1.38(1)  |
| N2   | C17  | 1.40(1)  | C1   | C2   | 1.37(1)  |
| C1   | C5   | 1.38(1)  | C1   | C100 | 1.17(1)  |
| C2   | C3   | 1.42(1)  | C2   | C100 | 1.18(1)  |
| C3   | C4   | 1.39(1)  | C3   | C100 | 1.19(1)  |
| C4   | C5   | 1.40(1)  | C4   | C100 | 1.19(1)  |
| C5   | C100 | 1.17(1)  | C9   | C10  | 1.40(1)  |
| C9   | C14  | 1.39(1)  | C10  | C11  | 1.38(1)  |
| C10  | C15  | 1.49(1)  | C11  | C12  | 1.40(1)  |
| C12  | C13  | 1.37(1)  | C13  | C14  | 1.41(1)  |
| C14  | C16  | 1.48(1)  | C17  | C18  | 1.42(1)  |
| C17  | C22  | 1.40(1)  | C18  | C19  | 1.39(1)  |
| C18  | C23  | 1.49(1)  | C19  | C20  | 1.35(1)  |
| C20  | C21  | 1.40(1)  | C21  | C22  | 1.40(1)  |
| C22  | C24  | 1.50(1)  | C25  | C26  | 1.30(5)  |
| C25  | C26  | 1.30(5)  | C25  | C28  | 1.24(5)  |
| C25  | C28  | 1.24(5)  | C26  | C26  | 1.5(1)   |
| C26  | C27  | 1.23(5)  | C26  | C28  | 1.22(6)  |
| C27  | C28  | 1.35(5)  |      |      |          |
| N2   | H1   | 0.81(8)  | C1   | H2   | 0.91     |
| C2   | H3   | 1.01     | C3   | H4   | 0.98     |
| C4   | H5   | 0.98     | C5   | H6   | 0.96     |
| C6   | H7   | 0.90     | C6   | H8   | 0.96     |
| C6   | H9   | 1.00     | C7   | H10  | 0.97     |
| C7   | H11  | 1.00     | C7   | H12  | 0.95     |

|     |     |      |     |     |      |
|-----|-----|------|-----|-----|------|
| C8  | H13 | 1.00 | C8  | H14 | 0.95 |
| C8  | H15 | 0.95 | C11 | H16 | 1.01 |
| C12 | H17 | 1.00 | C13 | H18 | 1.00 |
| C15 | H19 | 1.01 | C15 | H20 | 0.96 |
| C15 | H21 | 0.97 | C16 | H22 | 0.97 |
| C16 | H23 | 0.96 | C16 | H24 | 1.01 |
| C19 | H25 | 0.98 | C20 | H26 | 0.98 |
| C21 | H27 | 0.96 | C23 | H28 | 0.95 |
| C23 | H29 | 0.98 | C23 | H30 | 0.93 |
| C24 | H31 | 0.99 | C24 | H32 | 0.99 |
| C24 | H33 | 0.94 |     |     |      |

Table S11. Bond Angles (°)

| atom | atom | atom | angle     | atom | atom | atom | angle     |
|------|------|------|-----------|------|------|------|-----------|
| O1   | TI1  | N1   | 102.3 (3) | O1   | TI1  | N2   | 103.8 (3) |
| O1   | TI1  | C1   | 82.3 (3)  | O1   | TI1  | C2   | 92.7 (3)  |
| O1   | TI1  | C3   | 127.5 (4) | O1   | TI1  | C4   | 136.7 (3) |
| O1   | TI1  | C5   | 105.3 (3) | O1   | TI1  | C100 | 110.1 (2) |
| N1   | TI1  | N2   | 100.9 (4) | N1   | TI1  | C1   | 139.5 (4) |
| N1   | TI1  | C2   | 107.0 (4) | N1   | TI1  | C3   | 93.2 (4)  |
| N1   | TI1  | C4   | 114.7 (4) | N1   | TI1  | C5   | 147.3 (4) |
| N1   | TI1  | C100 | 123.3 (3) | N2   | TI1  | C100 | 114.2 (3) |
| O1   | P1   | C6   | 112.8 (4) | O1   | P1   | C7   | 108.9 (5) |
| O1   | P1   | C8   | 112.0 (5) | C6   | P1   | C7   | 108.0 (5) |
| C6   | P1   | C8   | 106.0 (6) | C7   | P1   | C8   | 109.0 (6) |
| TI1  | O1   | P1   | 132.9 (4) | TI1  | N1   | C9   | 172.4 (7) |
| TI1  | N2   | C17  | 134.1 (7) | C2   | C1   | C5   | 109 (1)   |
| C1   | C2   | C3   | 108 (1)   | C2   | C3   | C4   | 107 (1)   |
| C3   | C4   | C5   | 108 (1)   | C1   | C5   | C4   | 108 (1)   |
| N1   | C9   | C10  | 122.0 (9) | N1   | C9   | C14  | 118.4 (9) |
| C10  | C9   | C14  | 119.5 (9) | C9   | C10  | C11  | 121 (1)   |
| C9   | C10  | C15  | 122 (1)   | C11  | C10  | C15  | 117.5 (9) |
| C10  | C11  | C12  | 120 (1)   | C11  | C12  | C13  | 119 (1)   |
| C12  | C13  | C14  | 122 (1)   | C9   | C14  | C13  | 119 (1)   |
| C9   | C14  | C16  | 120 (1)   | C13  | C14  | C16  | 121 (1)   |
| N2   | C17  | C18  | 122 (1)   | N2   | C17  | C22  | 119.5 (9) |
| C18  | C17  | C22  | 119 (1)   | C17  | C18  | C19  | 120 (1)   |
| C17  | C18  | C23  | 119 (1)   | C19  | C18  | C23  | 121 (1)   |
| C18  | C19  | C20  | 121 (1)   | C19  | C20  | C21  | 121 (1)   |
| C20  | C21  | C22  | 120 (1)   | C17  | C22  | C21  | 120 (1)   |
| C17  | C22  | C24  | 121 (1)   | C21  | C22  | C24  | 119 (1)   |
| C26  | C25  | C26  | 72 (5)    | C26  | C25  | C28  | 57 (3)    |
| C26  | C25  | C28  | 108 (5)   | C26  | C25  | C28  | 108 (5)   |
| C26  | C25  | C28  | 57 (3)    | C28  | C25  | C28  | 163 (6)   |
| C25  | C26  | C26  | 54 (2)    | C25  | C26  | C27  | 118 (4)   |
| C25  | C26  | C28  | 59 (3)    | C26  | C26  | C27  | 161 (7)   |
| C26  | C26  | C28  | 96 (5)    | C27  | C26  | C28  | 67 (3)    |
| C26  | C27  | C28  | 56 (3)    | C25  | C28  | C26  | 64 (3)    |
| C25  | C28  | C27  | 114 (4)   | C26  | C28  | C27  | 57 (3)    |
| TI1  | C100 | C1   | 93.0 (5)  | TI1  | C100 | C2   | 88.6 (5)  |
| TI1  | C100 | C3   | 86.1 (5)  | TI1  | C100 | C4   | 89.6 (5)  |
| TI1  | C100 | C5   | 92.8 (5)  |      |      |      |           |
| TI1  | N2   | H1   | 105 (7)   | C17  | N2   | H1   | 109 (7)   |
| TI1  | C1   | H2   | 121.2     | C2   | C1   | H2   | 120.4     |
| C5   | C1   | H2   | 130.6     | C100 | C1   | H2   | 175.3     |
| TI1  | C2   | H3   | 115.9     | C1   | C2   | H3   | 127.9     |

|     |     |     |       |      |     |     |       |
|-----|-----|-----|-------|------|-----|-----|-------|
| C3  | C2  | H3  | 124.2 | C100 | C2  | H3  | 176.8 |
| TI1 | C3  | H4  | 119.1 | C2   | C3  | H4  | 123.7 |
| C4  | C3  | H4  | 129.2 | C100 | C3  | H4  | 175.8 |
| TI1 | C4  | H5  | 116.4 | C3   | C4  | H5  | 121.3 |
| C5  | C4  | H5  | 130.7 | C100 | C4  | H5  | 175.2 |
| TI1 | C5  | H6  | 120.6 | C1   | C5  | H6  | 128.9 |
| C4  | C5  | H6  | 122.8 | C100 | C5  | H6  | 176.9 |
| P1  | C6  | H7  | 112.7 | P1   | C6  | H8  | 109.1 |
| P1  | C6  | H9  | 107.0 | H7   | C6  | H8  | 113.2 |
| H7  | C6  | H9  | 109.7 | H8   | C6  | H9  | 104.7 |
| P1  | C7  | H10 | 113.3 | P1   | C7  | H11 | 111.8 |
| P1  | C7  | H12 | 114.5 | H10  | C7  | H11 | 103.6 |
| H10 | C7  | H12 | 107.5 | H11  | C7  | H12 | 105.2 |
| P1  | C8  | H13 | 110.1 | P1   | C8  | H14 | 113.4 |
| P1  | C8  | H15 | 113.7 | H13  | C8  | H14 | 104.7 |
| H13 | C8  | H15 | 105.1 | H14  | C8  | H15 | 109.2 |
| C10 | C11 | H16 | 120.2 | C12  | C11 | H16 | 119.9 |
| C11 | C12 | H17 | 120.1 | C13  | C12 | H17 | 120.5 |
| C12 | C13 | H18 | 118.1 | C14  | C13 | H18 | 120.3 |
| C10 | C15 | H19 | 112.3 | C10  | C15 | H20 | 116.4 |
| C10 | C15 | H21 | 113.0 | H19  | C15 | H20 | 103.8 |
| H19 | C15 | H21 | 103.5 | H20  | C15 | H21 | 106.7 |
| C14 | C16 | H22 | 114.3 | C14  | C16 | H23 | 114.2 |
| C14 | C16 | H24 | 113.1 | H22  | C16 | H23 | 107.0 |
| H22 | C16 | H24 | 102.9 | H23  | C16 | H24 | 104.2 |
| C18 | C19 | H25 | 116.7 | C20  | C19 | H25 | 122.3 |
| C19 | C20 | H26 | 119.5 | C21  | C20 | H26 | 119.8 |
| C20 | C21 | H27 | 118.9 | C22  | C21 | H27 | 120.8 |
| C18 | C23 | H28 | 109.5 | C18  | C23 | H29 | 110.0 |
| C18 | C23 | H30 | 111.6 | H28  | C23 | H29 | 106.8 |
| H28 | C23 | H30 | 110.4 | H29  | C23 | H30 | 108.4 |
| C22 | C24 | H31 | 112.3 | C22  | C24 | H32 | 112.9 |
| C22 | C24 | H33 | 115.5 | H31  | C24 | H32 | 102.6 |
| H31 | C24 | H33 | 106.2 | H32  | C24 | H33 | 106.3 |

Table S12. Torsion Angles (°)

| atom | atom | atom | atom | angle     | atom | atom | atom | atom | angle     |
|------|------|------|------|-----------|------|------|------|------|-----------|
| TI1  | O1   | P1   | C6   | -62.9(7)  | TI1  | O1   | P1   | C7   | 177.2(5)  |
| TI1  | O1   | P1   | C8   | 56.6(7)   | TI1  | N1   | C9   | C10  | -54(6)    |
| TI1  | N1   | C9   | C14  | 127(5)    | TI1  | N2   | C17  | C18  | -111(1)   |
| TI1  | N2   | C17  | C22  | 68(1)     | TI1  | C100 | C1   | C2   | -87.5(6)  |
| TI1  | C100 | C1   | C5   | 92.0(6)   | TI1  | C100 | C2   | C1   | 93.6(6)   |
| TI1  | C100 | C2   | C3   | -86.3(6)  | TI1  | C100 | C3   | C2   | 89.7(6)   |
| TI1  | C100 | C3   | C4   | -90.9(6)  | TI1  | C100 | C4   | C3   | 86.0(6)   |
| TI1  | C100 | C4   | C5   | -93.1(6)  | TI1  | C100 | C5   | C1   | -92.2(6)  |
| TI1  | C100 | C5   | C4   | 88.7(6)   | P1   | O1   | TI1  | N1   | 26.7(6)   |
| P1   | O1   | TI1  | N2   | -77.9(6)  | P1   | O1   | TI1  | C100 | 159.5(5)  |
| O1   | TI1  | N1   | C9   | 127(5)    | O1   | TI1  | N2   | C17  | -101(1)   |
| O1   | TI1  | C100 | C1   | 13.4(6)   | O1   | TI1  | C100 | C2   | -57.3(6)  |
| O1   | TI1  | C100 | C3   | -131.1(6) | O1   | TI1  | C100 | C4   | 157.6(6)  |
| O1   | TI1  | C100 | C5   | 85.2(6)   | N1   | TI1  | N2   | C17  | 154(1)    |
| N1   | TI1  | C100 | C1   | 134.2(6)  | N1   | TI1  | C100 | C2   | 63.5(6)   |
| N1   | TI1  | C100 | C3   | -10.2(6)  | N1   | TI1  | C100 | C4   | -81.6(6)  |
| N1   | TI1  | C100 | C5   | -154.0(6) | N1   | C9   | C10  | C11  | -179.1(9) |
| N1   | C9   | C10  | C15  | 3(2)      | N1   | C9   | C14  | C13  | 179.6(9)  |
| N1   | C9   | C14  | C16  | -1(2)     | N2   | TI1  | N1   | C9   | -127(5)   |

|     |     |      |      |           |     |     |      |      |           |
|-----|-----|------|------|-----------|-----|-----|------|------|-----------|
| N2  | TI1 | C100 | C1   | -102.9(6) | N2  | TI1 | C100 | C2   | -173.6(6) |
| N2  | TI1 | C100 | C3   | 112.7(6)  | N2  | TI1 | C100 | C4   | 41.3(6)   |
| N2  | TI1 | C100 | C5   | -31.1(6)  | N2  | C17 | C18  | C19  | 178(1)    |
| N2  | C17 | C18  | C23  | 0(2)      | N2  | C17 | C22  | C21  | -177(1)   |
| N2  | C17 | C22  | C24  | 7(2)      | C1  | C2  | C3   | C4   | 0(1)      |
| C1  | C5  | C4   | C3   | -1(1)     | C2  | C1  | C5   | C4   | 1(1)      |
| C2  | C3  | C4   | C5   | 1(1)      | C3  | C2  | C1   | C5   | 0(1)      |
| C9  | N1  | TI1  | C100 | 2(6)      | C9  | C10 | C11  | C12  | 0(2)      |
| C9  | C14 | C13  | C12  | -1(2)     | C10 | C9  | C14  | C13  | 0(2)      |
| C10 | C9  | C14  | C16  | 179.4(9)  | C10 | C11 | C12  | C13  | 0(2)      |
| C11 | C10 | C9   | C14  | 0(2)      | C11 | C12 | C13  | C14  | 1(2)      |
| C12 | C11 | C10  | C15  | 178(1)    | C12 | C13 | C14  | C16  | -180(1)   |
| C14 | C9  | C10  | C15  | -177.7(9) | C17 | N2  | TI1  | C100 | 19(1)     |
| C17 | C18 | C19  | C20  | 1(2)      | C17 | C22 | C21  | C20  | -2(2)     |
| C18 | C17 | C22  | C21  | 3(2)      | C18 | C17 | C22  | C24  | -174(1)   |
| C18 | C19 | C20  | C21  | 0(2)      | C19 | C18 | C17  | C22  | -2(2)     |
| C19 | C20 | C21  | C22  | 1(2)      | C20 | C19 | C18  | C23  | 179(1)    |
| C20 | C21 | C22  | C24  | 174(1)    | C22 | C17 | C18  | C23  | 179.9(9)  |
